# Supplementary material for: The Role of RNF213 4810G>A and 4950G>A Variants in Patients with Moyamoya Disease in Korea
Source: PubMed Central journal article supplement (PMC5713443; doi:10.3390/ijms18112477), 2017-11-21
Supplement: ijms-18-02477-s001.pdf [file ijms-18-02477-s001.pdf]

## Supplementary Tables

**Table S1.** Haplotype analysis (4, 3 site) of *RNF213* in MMD patients and control subjects of pediatric group.

| Haplotypes                                    | Controls (2n = 204) | Age < 18 Years (2n = 114) | OR (95% CI)          | p       | FDR-P |
|-----------------------------------------------|---------------------|---------------------------|----------------------|---------|-------|
| <i>RNF213</i> 4448G>A/4810G>A/4863G>A/4950G>A |                     |                           |                      |         |       |
| G-G-G-G                                       | 0.7428 (152)        | 0.4956 (56)               | 1.000 (reference)    |         |       |
| G-G-G-A                                       | 0.0386 (8)          | 0.0261 (3)                | 1.018 (0.261-3.974)  | 1.000   | 1.000 |
| G-G-A-G                                       | 0.0938 (19)         | 0.0000 (0)                | 0.070 (0.004-1.166)  | 0.005   | 0.024 |
| G-A-G-G                                       | 0.0325 (7)          | 0.3444 (39)               | 15.12 (6.392-35.78)  | <0.0001 | 0.001 |
| G-A-G-A                                       | 0.0081 (2)          | 0.0286 (3)                | 4.071 (0.663-25.02)  | 0.132   | 0.263 |
| G-A-A-G                                       | 0.0204 (4)          | 0.0526 (6)                | 4.071 (1.107-14.97)  | 0.033   | 0.111 |
| A-G-G-G                                       | 0.0504 (10)         | 0.0309 (4)                | 1.086 (0.327-3.603)  | 1.000   | 1.000 |
| A-G-G-A                                       | 0.0072 (1)          | 0.0000 (0)                | 0.900 (0.036-22.43)  | 1.000   | 1.000 |
| A-G-A-G                                       | 0.0034 (1)          | 0.0000 (0)                | 0.900 (0.036-22.43)  | 1.000   | 1.000 |
| A-A-G-G                                       | 0.0027 (1)          | 0.0063 (1)                | 2.714 (0.167-44.16)  | 0.470   | 0.784 |
| A-A-G-A                                       | 0.0000 (0)          | 0.0154 (2)                | 13.50 (0.638-285.7)  | 0.075   | 0.188 |
| <i>RNF213</i> 4448G>A/4810G>A/4863G>A         |                     |                           |                      |         |       |
| G-G-G                                         | 0.7782 (159)        | 0.5219 (59)               | 1.000 (reference)    |         |       |
| G-G-A                                         | 0.0960 (20)         | 0.0000 (0)                | 0.065 (0.004-1.099)  | 0.005   | 0.012 |
| G-A-G                                         | 0.0429 (9)          | 0.3728 (42)               | 12.58 (5.767-27.43)  | <0.0001 | 0.001 |
| G-A-A                                         | 0.0192 (4)          | 0.0526 (6)                | 4.042 (1.101-14.84)  | 0.034   | 0.057 |
| A-G-G                                         | 0.0597 (12)         | 0.0307 (3)                | 0.674 (0.183-2.473)  | 0.765   | 0.765 |
| A-G-A                                         | 0.0024 (0)          | 0.0000 (0)                | N/A                  | -       | -     |
| A-A-G                                         | 0.0016 (0)          | 0.0219 (2)                | 13.40 (0.634-283.5)  | 0.076   | 0.095 |
| <i>RNF213</i> 4448G>A/4810G>A/4950G>A         |                     |                           |                      |         |       |
| G-G-G                                         | 0.8342 (170)        | 0.4649 (53)               | 1.000 (reference)    |         |       |
| G-G-A                                         | 0.0396 (8)          | 0.0526 (6)                | 2.406 (0.799-7.247)  | 0.119   | 0.238 |
| G-A-G                                         | 0.0553 (11)         | 0.4298 (49)               | 14.29 (6.933-29.45)  | <0.0001 | 0.001 |
| G-A-A                                         | 0.0072 (1)          | 0.0000 (0)                | 1.062 (0.042-26.48)  | 1.000   | 1.000 |
| A-G-G                                         | 0.0553 (11)         | 0.0351 (4)                | 1.166 (0.356-3.817)  | 0.760   | 1.000 |
| A-G-A                                         | 0.0072 (1)          | 0.0000 (0)                | 1.062 (0.042-26.48)  | 1.000   | 1.000 |
| A-A-G                                         | 0.0012 (0)          | 0.0000 (0)                | -                    | -       | -     |
| A-A-A                                         | 0.0000 (0)          | 0.0175 (2)                | 15.93 (0.7527-337.3) | 0.059   | 0.177 |
| <i>RNF213</i> 4448G>A/4863G>A/4950G>A         |                     |                           |                      |         |       |
| G-G-G                                         | 0.7724 (158)        | 0.8396 (96)               | 1.000 (reference)    |         |       |
| G-G-A                                         | 0.0476 (10)         | 0.0551 (6)                | 0.988 (0.348-2.804)  | 1.000   | 1.000 |
| G-A-G                                         | 0.1163 (24)         | 0.0526 (6)                | 0.412 (0.162-1.043)  | 0.069   | 0.278 |
| A-G-G                                         | 0.0560 (11)         | 0.0376 (4)                | 0.599 (0.185-1.933)  | 0.584   | 0.778 |
| A-G-A                                         | 0.0064 (1)          | 0.0151 (2)                | 3.292 (0.294-36.81)  | 0.560   | 0.778 |
| A-A-G                                         | 0.0014 (0)          | 0.0000 (0)                | -                    | -       | -     |
| <i>RNF213</i> 4810G>A/4863G>A/4950G>A         |                     |                           |                      |         |       |
| G-G-G                                         | 0.7925 (162)        | 0.5263 (60)               | 1.000 (reference)    |         |       |
| G-G-A                                         | 0.0462 (9)          | 0.0263 (3)                | 0.900 (0.236-3.438)  | 1.000   | 1.000 |
| G-A-G                                         | 0.0976 (20)         | 0.0000 (0)                | 0.066 (0.004-1.101)  | 0.005   | 0.013 |
| A-G-G                                         | 0.0359 (7)          | 0.3509 (40)               | 15.43 (6.554-36.32)  | <0.0001 | 0.001 |
| A-G-A                                         | 0.0077 (2)          | 0.0439 (5)                | 6.750 (1.275-35.74)  | 0.021   | 0.035 |
| A-A-G                                         | 0.0201 (4)          | 0.0526 (6)                | 4.050 (1.104-14.86)  | 0.034   | 0.042 |

MMD, moyamoya disease; N/A, not application; FDR, false discovery rate.

**Table S2.** Haplotype analysis (4, 3site) of *RNF213* in MMD patients and control subjects of adult group.

| Haplotypes                                   | Controls (2n = 302) | Age ≥ 18 Years (2n = 120) | OR (95% CI)         | p       | FDR-P |
|----------------------------------------------|---------------------|---------------------------|---------------------|---------|-------|
| <i>RNF213</i> 4448G>A/4810G>A/4863G>/4950G>A |                     |                           |                     |         |       |
| G-G-G-G                                      | 0.8352 (252)        | 0.5145 (62)               | 1.000 (reference)   |         |       |
| G-G-G-A                                      | 0.0573 (17)         | 0.0438 (5)                | 1.195 (0.425–3.367) | 0.782   | 1.000 |
| G-G-A-G                                      | 0.0145 (4)          | 0.0000 (0)                | 0.449 (0.023–8.454) | 1.000   | 1.000 |
| G-G-A-A                                      | 0.0023 (1)          | 0.0000 (0)                | 15.12 (6.392–35.78) | <0.0001 | 0.001 |
| G-A-G-G                                      | 0.0148 (4)          | 0.3006 (36)               | 1.347 (0.054–33.48) | 1.000   | 1.000 |
| G-A-G-A                                      | 0.0000 (0)          | 0.0994 (12)               | 101.0 (5.895–173.0) | <0.0001 | 0.001 |
| G-A-A-G                                      | 0.0031 (1)          | 0.0182 (2)                | 8.129 (0.725–91.15) | 0.105   | 0.189 |
| G-A-A-A                                      | 0.0000 (0)          | 0.0068 (1)                | 12.12 (0.488–301.3) | 0.200   | 0.300 |
| A-G-G-G                                      | 0.0708 (21)         | 0.0000 (0)                | 0.094 (0.006–1.573) | 0.019   | 0.056 |
| A-A-G-G                                      | 0.0021 (1)          | 0.0167 (2)                | 8.129 (0.725–91.15) | 0.105   | 0.189 |
| <i>RNF213</i> 4448G>A/4810G>A/4863G>A        |                     |                           |                     |         |       |
| G-G-G                                        | 0.8926 (270)        | 0.5583 (67)               | 1.000 (reference)   |         |       |
| G-G-A                                        | 0.0168 (5)          | 0.0000 (0)                | 0.364 (0.020–6.674) | 0.587   | 0.587 |
| G-A-G                                        | 0.0147 (4)          | 0.4000 (48)               | 48.36 (16.84–138.8) | <0.0001 | 0.001 |
| G-A-A                                        | 0.0030 (1)          | 0.0250 (3)                | 12.09 (1.237–118.1) | 0.029   | 0.048 |
| A-G-G                                        | 0.0707 (21)         | 0.0000 (0)                | 0.093 (0.006–1.559) | 0.019   | 0.047 |
| A-A-G                                        | 0.0021 (1)          | 0.0167 (2)                | 8.06 (0.720–90.27)  | 0.106   | 0.133 |
| <i>RNF213</i> 4448G>A/4810G>A/4950G>A        |                     |                           |                     |         |       |
| G-G-G                                        | 0.8495 (257)        | 0.5145 (62)               | 1.000 (reference)   |         |       |
| G-G-A                                        | 0.0596 (18)         | 0.0438 (5)                | 1.151 (0.411–3.222) | 0.787   | 0.787 |
| G-A-G                                        | 0.0181 (5)          | 0.3188 (38)               | 31.50 (11.91–83.35) | <0.0001 | 0.000 |
| G-A-A                                        | 0.0000 (0)          | 0.1062 (13)               | 111.2 (6.520–1898)  | <0.0001 | 0.000 |
| A-G-G                                        | 0.0710 (21)         | 0.0000 (0)                | 0.096 (0.006–1.604) | 0.019   | 0.031 |
| A-A-G                                        | 0.0018 (1)          | 0.0167 (2)                | 8.290 (0.739–92.95) | 0.102   | 0.127 |
| <i>RNF213</i> 4448G>A/4863G>A/4950G>A        |                     |                           |                     |         |       |
| G-G-G                                        | 0.8498 (257)        | 0.8130 (98)               | 1.000 (reference)   |         |       |
| G-G-A                                        | 0.0575 (17)         | 0.1453 (17)               | 2.622 (1.287–5.342) | 0.010   | 0.039 |
| G-A-G                                        | 0.0178 (5)          | 0.0203 (2)                | 1.049 (0.200–5.499) | 1.000   | 1.000 |
| G-A-A                                        | 0.0021 (1)          | 0.0047 (1)                | 2.622 (0.162–42.37) | 0.478   | 0.637 |
| A-G-G                                        | 0.0728 (22)         | 0.0167 (2)                | 0.238 (0.055–1.033) | 0.052   | 0.105 |
| <i>RNF213</i> 4810G>A/4863G>A/4950G>A        |                     |                           |                     |         |       |
| G-G-G                                        | 0.9061 (274)        | 0.5066 (61)               | 1.000 (reference)   |         |       |
| G-G-A                                        | 0.0572 (17)         | 0.0517 (6)                | 1.585 (0.600–4.188) | 0.404   | 0.566 |
| G-A-G                                        | 0.0144 (4)          | 0.0000 (0)                | 0.496 (0.026–9.339) | 1.000   | 1.000 |
| G-A-A                                        | 0.0024 (1)          | 0.0000 (0)                | 1.488 (0.060–36.99) | 1.000   | 1.000 |
| A-G-G                                        | 0.0168 (5)          | 0.3248 (39)               | 35.04 (13.26–92.58) | <0.0001 | 0.000 |
| A-G-A                                        | 0.0000 (0)          | 0.0918 (11)               | 102.7 (5.964–1767)  | <0.0001 | 0.000 |
| A-A-G                                        | 0.0030 (1)          | 0.0186 (2)                | 8.984 (0.801–100.7) | 0.0904  | 0.211 |
| A-A-A                                        | 0.0000 (0)          | 0.0064 (1)                | 13.39 (0.539–332.9) | 0.1845  | 0.323 |

MMD, moyamoya disease; N/A, not application; FDR, false discovery rate.

**Table S3.** Haplotype analysis (2 site) of *RNF213* in MMD patients and control subjects of pediatric group.

| Haplotype                     | Controls (2n = 204) | Age < 18 years (2n = 114) | OR (95% CI)         | p       | FDR-P  |
|-------------------------------|---------------------|---------------------------|---------------------|---------|--------|
| <i>RNF213</i> 4448G>A/4810G>A |                     |                           |                     |         |        |
| G-G                           | 0.8728 (178)        | 0.5000 (57)               | 1.000 (reference)   |         |        |
| G-A                           | 0.0634 (13)         | 0.4474 (51)               | 12.25 (6.217–24.14) | <0.0001 | 0.0002 |
| A-G                           | 0.0634 (13)         | 0.0526 (6)                | 1.441 (0.524–3.967) | 0.580   | 0.580  |
| A-A                           | 0.0003 (0)          | 0.0000 (0)                | N/A                 |         |        |
| <i>RNF213</i> 4448G>A/4863G>A |                     |                           |                     |         |        |
| G-G                           | 0.8195 (167)        | 0.8947 (102)              | 1.000 (reference)   |         |        |
| G-A                           | 0.1168 (24)         | 0.0526 (6)                | 0.409 (0.162–1.035) | 0.070   | 0.140  |
| A-G                           | 0.0629 (13)         | 0.0526 (6)                | 0.756 (0.278–2.051) | 0.634   | 0.634  |
| A-A                           | 0.0008 (0)          | 0.0000 (0)                | N/A                 |         |        |
| <i>RNF213</i> 4448G>A/4950G>A |                     |                           |                     |         |        |
| G-G                           | 0.8891 (181)        | 0.8924 (102)              | 1.000 (reference)   |         |        |
| G-A                           | 0.0471 (10)         | 0.0549 (6)                | 1.065 (0.376–3.015) | 1.000   | 1.000  |
| A-G                           | 0.0569 (12)         | 0.0374 (4)                | 0.592 (0.186–1.882) | 0.433   | 0.649  |
| A-A                           | 0.0068 (1)          | 0.0152 (2)                | 3.549 (0.318–39.64) | 0.300   | 0.649  |
| <i>RNF213</i> 4810G>A/4863G>A |                     |                           |                     |         |        |
| G-G                           | 0.8379 (171)        | 0.5526 (63)               | 1.000 (reference)   |         |        |
| G-A                           | 0.0984 (20)         | 0.0000 (0)                | 0.066 (0.004–1.106) | 0.005   | 0.008  |
| A-G                           | 0.0444 (9)          | 0.3947 (45)               | 13.57 (6.271–29.37) | <0.0001 | 0.0003 |
| A-A                           | 0.0193 (4)          | 0.0526 (6)                | 4.071 (1.112–14.91) | 0.033   | 0.033  |
| <i>RNF213</i> 4810G>A/4950G>A |                     |                           |                     |         |        |
| G-G                           | 0.8891 (181)        | 0.4825 (55)               | 1.000 (reference)   |         |        |
| G-A                           | 0.0471 (10)         | 0.0702 (8)                | 2.633 (0.990–6.999) | 0.084   | 0.126  |
| A-G                           | 0.0569 (12)         | 0.4474 (51)               | 13.99 (6.962–28.10) | <0.0001 | 0.0003 |
| A-A                           | 0.0068 (1)          | 0.0000 (0)                | 1.090 (0.044–27.16) | 1.000   | 1.000  |
| <i>RNF213</i> 4863G>A/4950G>A |                     |                           |                     |         |        |
| G-G                           | 0.8284 (169)        | 0.8772 (100)              | 1.000 (reference)   |         |        |
| G-A                           | 0.0539 (11)         | 0.0702 (8)                | 1.229 (0.478–3.159) | 0.807   | 0.807  |
| A-G                           | 0.1176 (24)         | 0.0526 (6)                | 0.423 (0.167–1.069) | 0.071   | 0.142  |
| A-A                           | 0                   | 0                         | N/A                 |         |        |

MMD, moyamoya disease; N/A, not application; FDR, false discovery rate.

**Table S4.** Haplotype analysis (2 site) of *RNF213* in MMD patients and control subjects of adult group.

| Haplotypes                    | Controls (2n = 302) | Age ≥ 18 Years (2n = 120) | OR (95% CI)         | p       | FDR-P |
|-------------------------------|---------------------|---------------------------|---------------------|---------|-------|
| <i>RNF213</i> 4448G>A/4810G>A |                     |                           |                     |         |       |
| G-G                           | 0.9092 (275)        | 0.5583 (67)               | 1.000 (reference)   |         |       |
| G-A                           | 0.0180 (5)          | 0.4250 (51)               | 41.87 (16.08–109.0) | <0.0001 | 0.000 |
| A-G                           | 0.0709 (21)         | 0.0000 (0)                | 0.095 (0.006–1.588) | 0.019   | 0.028 |
| A-A                           | 0.0019 (1)          | 0.0167 (2)                | 8.209 (0.733–91.94) | 0.103   | 0.103 |
| <i>RNF213</i> 4448G>A/4863G>A |                     |                           |                     |         |       |
| G-G                           | 0.9073 (274)        | 0.9583 (115)              | 1.000 (reference)   |         |       |
| G-A                           | 0.0199 (6)          | 0.0250 (3)                | 1.191 (0.293–4.847) | 0.728   | 0.728 |
| A-G                           | 0.0728 (22)         | 0.0167 (2)                | 0.217 (0.050–0.937) | 0.033   | 0.066 |
| <i>RNF213</i> 4448G>A/4950G>A |                     |                           |                     |         |       |
| G-G                           | 0.8675 (262)        | 0.8333 (100)              | 1.000 (reference)   |         |       |
| G-A                           | 0.0596 (18)         | 0.1500 (18)               | 2.620 (1.310–5.239) | 0.007   | 0.014 |
| A-G                           | 0.0728 (22)         | 0.0167 (2)                | 0.238 (0.055–1.032) | 0.053   | 0.053 |
| <i>RNF213</i> 4810G>A/4863G>A |                     |                           |                     |         |       |
| G-G                           | 0.9633 (291)        | 0.5583 (67)               | 1.000 (reference)   |         |       |
| G-A                           | 0.0169 (5)          | 0.0000 (0)                | 0.393 (0.021–7.191) | 0.589   | 0.589 |
| A-G                           | 0.0169 (5)          | 0.4167 (50)               | 43.43 (16.68–113.1) | <0.0001 | 0.000 |
| A-A                           | 0.0030 (1)          | 0.0250 (3)                | 13.03 (1.334–127.3) | 0.024   | 0.036 |
| <i>RNF213</i> 4810G>A/4950G>A |                     |                           |                     |         |       |
| G-G                           | 0.9205 (278)        | 0.5066 (61)               | 1.000 (reference)   |         |       |
| G-A                           | 0.0596 (18)         | 0.0517 (6)                | 1.519 (0.579–3.987) | 0.414   | 0.414 |
| A-G                           | 0.0199 (6)          | 0.3434 (41)               | 31.14 (12.65–76.65) | <0.0001 | 0.000 |
| A-A                           | 0.0000 (0)          | 0.0983 (12)               | 113.2 (6.609–1939)  | <0.0001 | 0.000 |
| <i>RNF213</i> 4863G>A/4950G>A |                     |                           |                     |         |       |
| G-G                           | 0.9227 (279)        | 0.8298 (100)              | 1.000 (reference)   |         |       |
| G-A                           | 0.0574 (17)         | 0.1452 (17)               | 2.790 (1.371–5.676) | 0.005   | 0.016 |
| A-G                           | 0.0177 (5)          | 0.0202 (2)                | 1.116 (0.213–5.846) | 1.000   | 1.000 |
| A-A                           | 0.0022 (1)          | 0.0048 (1)                | 2.79 (0.1728–45.06) | 0.460   | 0.691 |

MMD, moyamoya disease; N/A, not application; FDR, false discovery rate.

**Table S5.** PCR conditions, primers and restriction enzyme used in this study.

| Gene               | RefSNP(rs) Number | PCR Condition                                                                    | Primer Sequence (5'-3')                                      | R/E                             |
|--------------------|-------------------|----------------------------------------------------------------------------------|--------------------------------------------------------------|---------------------------------|
| <i>RNF213</i> 4448 | rs148731719       | 95 °C 15 min,<br>95 °C 20 s, -63 °C 40 s, -72 °C 30 s, 35 cycles<br>72 °C 5 min. | CAAATGGTGGTGATTTCTCCA<br>CAACAATGGCACAGAATTGTC               | <i>AluI</i>                     |
| <i>RNF213</i> 4810 | rs112735431       | 95 °C 15 min,<br>95 °C 20 s, -65 °C 40 s, -72 °C 30 s, 35 cycles<br>72 °C 5 min. | AGCAGAGCTGAGGCTGGTAA<br>CTGTCAGAGCAGAGCCACAC                 | <i>Hpy188I</i>                  |
| <i>RNF213</i> 4863 | rs760732823       | 94 °C 7 min,<br>94 °C 30 s, -64 °C 30 s, -72 °C 30 s, 35 cycles<br>72 °C 7 min.  | TGTGTGTGGAGCTGATGGCT<br>AGGGAGGAGATACAGACCAGACT              | <i>Hpy188I</i>                  |
| <i>RNF213</i> 4950 | rs37144113        | 94 °C 7 min,<br>94 °C 30 s, -64 °C 30 s, -72 °C 30 s, 35 cycles<br>72 °C 7 min.  | GGTGGAGGAGGGCAGAGAGACCGTGCACGA<br>CTTCCCTCTCTCGAGAAACACACCAA | <i>BssS<math>\alpha</math>I</i> |

PCR, polymerase chain reaction; R/E, restriction enzyme.
